# Supplementary material
Source: PubMed Central journal article supplement (PMC3915911)
Supplement: cr2013158x1.pdf [file cr2013158x1.pdf]

**Supplementary information, Table S1** Differentially expressed genes within the broad region of 1q24 copy number gain

| Cytoband     | Start     | End       | Frequency (%) | Type 1        | Copy number | Gene symbol | Type 2 | Fold change |
|--------------|-----------|-----------|---------------|---------------|-------------|-------------|--------|-------------|
| 1q23.3-q24.1 | 162616201 | 165028985 | 43.1          | Amplification | 3           | LOC284685   | -      | -           |
| 1q23.3-q24.1 | 162616201 | 165028985 | 43.1          | Amplification | 3           | LOC646688   | -      | -           |
| 1q23.3-q24.1 | 162616201 | 165028985 | 43.1          | Amplification | 3           | LMX1A       | -      | -           |
| 1q23.3-q24.1 | 162616201 | 165028985 | 43.1          | Amplification | 3           | PBX1        | -      | -           |
| 1q23.3-q24.1 | 162616201 | 165028985 | 43.1          | Amplification | 3           | FAM78B      | -      | -           |
| 1q23.3-q24.1 | 162616201 | 165028985 | 43.1          | Amplification | 3           | RXRG        | -      | -           |
| 1q23.3-q24.1 | 162616201 | 165028985 | 43.1          | Amplification | 3           | UCK2        | -      | -           |
| 1q23.3-q24.1 | 162616201 | 165028985 | 43.1          | Amplification | 3           | LOC401975   | -      | -           |
| 1q23.3-q24.1 | 162616201 | 165028985 | 43.1          | Amplification | 3           | MGST3       | -      | -           |
| 1q23.3-q24.1 | 162616201 | 165028985 | 43.1          | Amplification | 3           | LOC440700   | -      | -           |
| 1q23.3-q24.1 | 162616201 | 165028985 | 43.1          | Amplification | 3           | LOC391126   | -      | -           |
| 1q23.3-q24.1 | 162616201 | 165028985 | 43.1          | Amplification | 3           | LOC401974   | -      | -           |
| 1q23.3-q24.1 | 162616201 | 165028985 | 43.1          | Amplification | 3           | LOC116123   | -      | -           |
| 1q23.3-q24.1 | 162616201 | 165028985 | 43.1          | Amplification | 3           | LRRC52      | -      | -           |
| 1q23.3-q24.1 | 162616201 | 165028985 | 43.1          | Amplification | 3           | ALDH9A1     | Down   | 0.66        |
| 1q23.3-q24.1 | 162616201 | 165028985 | 43.1          | Amplification | 3           | LOC729981   | -      | -           |
| 1q23.3-q24.1 | 162616201 | 165028985 | 43.1          | Amplification | 3           | TMCO1       | -      | -           |
| 1q24.1-q24.2 | 165028985 | 166069926 | 44.8          | Amplification | 3           | MPZL1       | Up     | 2.17        |
| 1q24.1-q24.2 | 165028985 | 166069926 | 44.8          | Amplification | 3           | LOC646693   | -      | -           |
| 1q24.1-q24.2 | 165028985 | 166069926 | 44.8          | Amplification | 3           | C1orf32     | -      | -           |
| 1q24.1-q24.2 | 165028985 | 166069926 | 44.8          | Amplification | 3           | AKR1D1P     | -      | -           |
| 1q24.1-q24.2 | 165028985 | 166069926 | 44.8          | Amplification | 3           | DUSP27      | -      | -           |
| 1q24.1-q24.2 | 165028985 | 166069926 | 44.8          | Amplification | 3           | SAC         | -      | -           |
| 1q24.1-q24.2 | 165028985 | 166069926 | 44.8          | Amplification | 3           | TADA1L      | -      | -           |
| 1q24.1-q24.2 | 165028985 | 166069926 | 44.8          | Amplification | 3           | POGK        | -      | -           |
| 1q24.1-q24.2 | 165028985 | 166069926 | 44.8          | Amplification | 3           | POU2F1      | -      | -           |
| 1q24.1-q24.2 | 165028985 | 166069926 | 44.8          | Amplification | 3           | GPA33       | -      | -           |
| 1q24.1-q24.2 | 165028985 | 166069926 | 44.8          | Amplification | 3           | RCSD1       | -      | -           |
| 1q24.1-q24.2 | 165028985 | 166069926 | 44.8          | Amplification | 3           | CREG1       | -      | -           |
| 1q24.1-q24.2 | 165028985 | 166069926 | 44.8          | Amplification | 3           | CD247       | -      | -           |
| 1q24.1-q24.2 | 165028985 | 166069926 | 44.8          | Amplification | 3           | LOC391130   | -      | -           |
| 1q24.1-q24.2 | 165028985 | 166069926 | 44.8          | Amplification | 3           | MAEL        | -      | -           |
| 1q24.2       | 166069926 | 166176243 | 44.8          | Amplification | 3           | IQWD1       | -      | -           |
| 1q24.2       | 166069926 | 166176243 | 44.8          | Amplification | 3           | BRP44       | -      | -           |
| 1q24.2       | 166182288 | 166671151 | 44.8          | Amplification | 3           | MGC12538    | -      | -           |
| 1q24.2       | 166182288 | 166671151 | 44.8          | Amplification | 3           | MIRN557     | -      | -           |
| 1q24.2       | 166182288 | 166671151 | 44.8          | Amplification | 3           | LOC730012   | -      | -           |
| 1q24.2       | 166182288 | 166671151 | 44.8          | Amplification | 3           | RPL34P1     | Up     | 1.76        |
| 1q24.2       | 166182288 | 166671151 | 44.8          | Amplification | 3           | TBX19       | -      | -           |
| 1q24.2       | 166182288 | 166671151 | 44.8          | Amplification | 3           | TIPRL       | -      | -           |

|              |           |           |      |               |     |           |      |      |
|--------------|-----------|-----------|------|---------------|-----|-----------|------|------|
| 1q24.2       | 166182288 | 166671151 | 44.8 | Amplification | 3   | LOC730107 | -    | -    |
| 1q24.2       | 166182288 | 166671151 | 44.8 | Amplification | 3   | LOC441914 | -    | -    |
| 1q24.2       | 166182288 | 166671151 | 44.8 | Amplification | 3   | GPR161    | -    | -    |
| 1q24.2       | 166182288 | 166671151 | 44.8 | Amplification | 3   | SFT2D2    | -    | -    |
| 1q24.2       | 166671151 | 166697049 | 44.8 | Amplification | 3   | LOC730016 | -    | -    |
| 1q24.2       | 166697049 | 167391013 | 44.8 | Amplification | 3   | LOC730022 | -    | -    |
| 1q24.2       | 166697049 | 167391013 | 44.8 | Amplification | 3   | XCL2      | -    | -    |
| 1q24.2       | 166697049 | 167391013 | 44.8 | Amplification | 3   | XCL1      | -    | -    |
| 1q24.2       | 166697049 | 167391013 | 44.8 | Amplification | 3   | NME7      | Up   | 1.5  |
| 1q24.2       | 166697049 | 167391013 | 44.8 | Amplification | 3   | DPT       | Down | 0.37 |
| 1q24.2       | 166697049 | 167391013 | 44.8 | Amplification | 3   | bA375F2.1 | -    | -    |
| 1q24.2       | 166697049 | 167391013 | 44.8 | Amplification | 3   | LOC391132 | -    | -    |
| 1q24.2       | 166697049 | 167391013 | 44.8 | Amplification | 3   | ATPIB1    | Up   | 1.71 |
| 1q24.2       | 167391013 | 167654314 | 44.8 | Amplification | 3.1 | BLZF1     | -    | -    |
| 1q24.2       | 167654314 | 167804414 | 44.8 | Amplification | 3.1 | C1orf114  | -    | -    |
| 1q24.2       | 167654314 | 167804414 | 44.8 | Amplification | 3.1 | SLC19A2   | -    | -    |
| 1q24.2       | 167804414 | 168195408 | 44.8 | Amplification | 3.1 | SCYL3     | -    | -    |
| 1q24.2       | 167804414 | 168195408 | 44.8 | Amplification | 3.1 | SELP      | -    | -    |
| 1q24.2       | 167804414 | 168195408 | 44.8 | Amplification | 3.1 | KIFAP3    | -    | -    |
| 1q24.2       | 167804414 | 168195408 | 44.8 | Amplification | 3.1 | F5        | -    | -    |
| 1q24.2       | 167804414 | 168195408 | 44.8 | Amplification | 3.1 | C1orf156  | -    | -    |
| 1q24.2       | 167804414 | 168195408 | 44.8 | Amplification | 3.1 | SELL      | -    | -    |
| 1q24.2       | 167804414 | 168195408 | 44.8 | Amplification | 3.1 | SELE      | -    | -    |
| 1q24.2       | 167804414 | 168195408 | 44.8 | Amplification | 3.1 | C1orf112  | -    | -    |
| 1q24.2-q24.3 | 168195408 | 169101068 | 44.8 | Amplification | 3.1 | MRPS10P1  | -    | -    |
| 1q24.2-q24.3 | 168195408 | 169101068 | 44.8 | Amplification | 3.1 | LOC730132 | -    | -    |
| 1q24.2-q24.3 | 168195408 | 169101068 | 44.8 | Amplification | 3.1 | C1orf184  | -    | -    |
| 1q24.2-q24.3 | 168195408 | 169101068 | 44.8 | Amplification | 3.1 | SIGLECP14 | -    | -    |
| 1q24.2-q24.3 | 168195408 | 169101068 | 44.8 | Amplification | 3.1 | SCYL1BP1  | -    | -    |
| 1q24.2-q24.3 | 168195408 | 169101068 | 44.8 | Amplification | 3.1 | PRRX1     | -    | -    |
| 1q24.3       | 169101068 | 169590922 | 44.8 | Amplification | 3   | FMO1      | -    | -    |
| 1q24.3       | 169101068 | 169590922 | 44.8 | Amplification | 3   | TOP1P1    | -    | -    |
| 1q24.3       | 169101068 | 169590922 | 44.8 | Amplification | 3   | FMO4      | -    | -    |
| 1q24.3       | 169101068 | 169590922 | 44.8 | Amplification | 3   | C1orf129  | -    | -    |
| 1q24.3       | 169101068 | 169590922 | 44.8 | Amplification | 3   | LOC646804 | -    | -    |
| 1q24.3       | 169101068 | 169590922 | 44.8 | Amplification | 3   | FMO2      | Down | 0.4  |
| 1q24.3       | 169101068 | 169590922 | 44.8 | Amplification | 3   | FMO3      | Down | 0.32 |
| 1q24.3       | 169101068 | 169590922 | 44.8 | Amplification | 3   | FMO6      | -    | -    |
| 1q24.3       | 169593294 | 171048849 | 44.8 | Amplification | 3   | KIAA0859  | -    | -    |
| 1q24.3       | 169593294 | 171048849 | 44.8 | Amplification | 3   | LOC391137 | -    | -    |
| 1q24.3       | 169593294 | 171048849 | 44.8 | Amplification | 3   | MYOC      | -    | -    |
| 1q24.3       | 169593294 | 171048849 | 44.8 | Amplification | 3   | FASLG     | -    | -    |
| 1q24.3       | 169593294 | 171048849 | 44.8 | Amplification | 3   | VAMP4     | -    | -    |
| 1q24.3       | 169593294 | 171048849 | 44.8 | Amplification | 3   | MIRN199A2 | -    | -    |

|        |           |           |      |               |   |           |    |      |
|--------|-----------|-----------|------|---------------|---|-----------|----|------|
| 1q24.3 | 169593294 | 171048849 | 44.8 | Amplification | 3 | PIGC      | Up | 2.03 |
| 1q24.3 | 169593294 | 171048849 | 44.8 | Amplification | 3 | LOC730048 | -  | -    |
| 1q24.3 | 169593294 | 171048849 | 44.8 | Amplification | 3 | LOC391136 | -  | -    |
| 1q24.3 | 169593294 | 171048849 | 44.8 | Amplification | 3 | BAT2D1    | -  | -    |
| 1q24.3 | 169593294 | 171048849 | 44.8 | Amplification | 3 | C1orf105  | -  | -    |
| 1q24.3 | 169593294 | 171048849 | 44.8 | Amplification | 3 | C1orf9    | -  | -    |
| 1q24.3 | 169593294 | 171048849 | 44.8 | Amplification | 3 | MIRN214   | -  | -    |
| 1q24.3 | 169593294 | 171048849 | 44.8 | Amplification | 3 | DNM3      | -  | -    |
| 1q24.3 | 169593294 | 171048849 | 44.8 | Amplification | 3 | LOC127099 | -  | -    |
| 1q24.3 | 169593294 | 171048849 | 44.8 | Amplification | 3 | LOC730053 | -  | -    |
| 1q24.3 | 169593294 | 171048849 | 44.8 | Amplification | 3 | CYCSP53   | -  | -    |
| 1q24.3 | 169593294 | 171048849 | 44.8 | Amplification | 3 | LOC730138 | -  | -    |
| 1q24.3 | 169593294 | 171048849 | 44.8 | Amplification | 3 | LOC391135 | -  | -    |
| 1q24.3 | 169593294 | 171048849 | 44.8 | Amplification | 3 | LOC441915 | -  | -    |

\*, Frequency for genes within CNA and fold change for differentially expressed genes among tumors versus adjacent non-tumor tissues. Type 1 for copy number alterations (Amplification or Deletion); Type 2 for differentially expressed genes (Up, Down and no change). RPL34P1 is a pseudogene.
