# Supplementary material
Source: PubMed Central journal article supplement (PMC3915911)
Supplement: cr2013158x3.pdf [file cr2013158x3.pdf]

**Supplementary information, Table S3** Summary of results derived from phospho-antibody array

| <b>Phosphorylation sites</b>    | <b>HUH-7 VECTOR</b> | <b>HUH-7 MPZL1</b> | <b>Ratio (HUH-7</b>  |
|---------------------------------|---------------------|--------------------|----------------------|
|                                 | <b>Ratio</b>        | <b>Ratio</b>       | <b>MPZL1/VECTOR)</b> |
| MEK1(Phospho-Thr286)            | 0.34                | 0.78               | 2.28                 |
| Synapsin(Phospho-Ser9)          | 0.71                | 1.17               | 1.65                 |
| PKCalpha/betaII(Phospho-Thr638) | 0.87                | 1.41               | 1.62                 |
| CDC25C(Phospho-Ser216)          | 0.23                | 0.36               | 1.61                 |
| FAK(Phospho-Tyr397)             | 0.59                | 0.90               | 1.52                 |
| p44/42MAPKinase(Phospho-Thr202) | 1.35                | 1.97               | 1.46                 |
| AKT(Phospho-Ser473)             | 0.91                | 1.29               | 1.42                 |
| PLCbeta3(Phospho-Ser537)        | 0.84                | 1.19               | 1.42                 |
| PKCalpha(Phospho-Tyr657)        | 1.30                | 1.80               | 1.39                 |
| BAD(Phospho-Ser155)             | 0.92                | 1.25               | 1.36                 |
| Paxillin(Phospho-Tyr118)        | 1.65                | 2.18               | 1.32                 |
| c-Raf(Phospho-Ser296)           | 0.75                | 0.99               | 1.32                 |
| SHP-2(Phospho-Tyr580)           | 0.83                | 1.09               | 1.31                 |
| Cortactin(Phospho-Tyr421)       | 1.55                | 2.01               | 1.30                 |
| CDC25A(Phospho-Ser75)           | 0.89                | 1.11               | 1.25                 |
| CDC2(Phospho-Tyr15)             | 0.98                | 1.22               | 1.24                 |
| Merlin(Phospho-Ser518)          | 1.40                | 1.73               | 1.24                 |
| MKK3/MAP2K3(Phospho-Thr222)     | 0.79                | 0.97               | 1.23                 |
| Pyk2(Phospho-Tyr402)            | 0.82                | 0.99               | 1.20                 |
| AKT(Phospho-Thr308)             | 1.34                | 1.60               | 1.20                 |
| p44/42MAPKinase(Phospho-Tyr204) | 1.03                | 1.23               | 1.19                 |
| Stathmin1(Phospho-Ser15)        | 0.90                | 1.07               | 1.19                 |
| Ezrin(Phospho-Tyr353)           | 0.90                | 1.06               | 1.19                 |
| Stathmin1(Phospho-Ser24)        | 0.86                | 1.01               | 1.18                 |
| Stathmin1(Phospho-Ser37)        | 0.85                | 0.99               | 1.17                 |

|                                                                 |      |      |      |
|-----------------------------------------------------------------|------|------|------|
| BAD(Phospho-Ser112)                                             | 1.09 | 1.28 | 1.17 |
| Src(Phospho-Tyr416)                                             | 0.64 | 0.74 | 1.16 |
| MEK1(Phospho-Ser221)                                            | 1.08 | 1.24 | 1.15 |
| Caveolin-1(Phospho-Tyr14)                                       | 0.88 | 0.99 | 1.12 |
| SHP-2(Phospho-Tyr542)                                           | 1.12 | 1.23 | 1.1  |
| VASP(Phospho-Ser157)                                            | 0.35 | 0.39 | 1.09 |
| GRB2(Phospho-Ser159)                                            | 1.14 | 1.23 | 1.08 |
| ERK3(Phospho-Ser189)                                            | 1.01 | 1.08 | 1.06 |
| Connexin43(Phospho-Ser367)                                      | 0.91 | 0.97 | 1.06 |
| WAVE1(Phospho-Tyr125)                                           | 1.03 | 1.08 | 1.05 |
| FAK(Phospho-Tyr925)                                             | 1.11 | 1.15 | 1.04 |
| p130Cas(Phospho-Tyr410)                                         | 0.98 | 1.02 | 1.04 |
| MEK1(Phospho-Ser298)                                            | 0.39 | 0.40 | 1.03 |
| CaMKII(Phospho-Thr286)                                          | 0.93 | 0.93 | 1.00 |
| FAK(Phospho-Tyr407)                                             | 0.95 | 0.95 | 1.00 |
| cofilin(Phospho-Ser3)                                           | 0.87 | 0.87 | 0.99 |
| c-Raf(Phospho-Ser43)                                            | 0.31 | 0.31 | 0.98 |
| CaMK4(Phospho-Thr196/200)                                       | 1.05 | 1.03 | 0.98 |
| CrkII(Phospho-Tyr221)                                           | 2.08 | 2.02 | 0.97 |
| ACTINPan(a/b/g)(Phospho-Tyr55/53)                               | 0.67 | 0.65 | 0.97 |
| FAK(Phospho-Tyr861)                                             | 1.36 | 1.30 | 0.96 |
| MKK7/MAP2K7(Phospho-Ser271)                                     | 1.04 | 1.00 | 0.96 |
| Rho/Racguanine nucleotide exchange factor 2(Phospho<br>-Ser885) | 1.23 | 1.17 | 0.95 |
| Raf1(Phospho-Ser338)                                            | 0.99 | 0.93 | 0.94 |
| PLC-beta(Phospho-Ser1105)                                       | 0.92 | 0.86 | 0.94 |
| Myosin regulatory light chain 2(Phospho-Ser18)                  | 0.88 | 0.83 | 0.94 |
| FilaminA(Phospho-Ser2152)                                       | 0.99 | 0.93 | 0.93 |
| G3BP-1(Phospho-Ser232)                                          | 1.29 | 1.20 | 0.93 |

|                                         |      |      |      |
|-----------------------------------------|------|------|------|
| Src(Phospho-Ser75)                      | 1.96 | 1.82 | 0.93 |
| GTPaseactivatingprotein(Phospho-Ser387) | 1.11 | 1.02 | 0.92 |
| LIMK1(Phospho-Thr508)                   | 1.17 | 1.07 | 0.92 |
| CaMK1-a(Phospho-Thr177)                 | 0.65 | 0.60 | 0.92 |
| AKT2(Phospho-Ser474)                    | 2.19 | 2.01 | 0.91 |
| VASP(Phospho-Ser238)                    | 1.00 | 0.91 | 0.91 |
| CDK2(Phospho-Thr160)                    | 0.97 | 0.86 | 0.89 |
| p130Cas(Phospho-Tyr165)                 | 1.15 | 1.01 | 0.88 |
| Merlin(Phospho-Ser10)                   | 1.18 | 1.03 | 0.87 |

---
