# Supplementary material
Source: PubMed Central journal article supplement (PMC3915911)
Supplement: cr2013158x4.pdf [file cr2013158x4.pdf]

**Supplementary information, Table S4** Proteins for which the phosphorylation states increased in HUH-7 cells overexpressing MPZL1

| Phosphorylation sites           | Ratio (HUH-7 MPZL1/VECTOR) | Prometastatic function (ref.)                             |
|---------------------------------|----------------------------|-----------------------------------------------------------|
| FAK(Phospho-Tyr397)             | 1.52                       | [ <i>Nature</i> 2007; <b>446</b> :815-819]                |
| Paxillin(Phospho-Tyr118)        | 1.32                       | [ <i>Breast Cancer Res Treat</i> 2012]                    |
| Cortactin(Phospho-Tyr421)       | 1.30                       | [ <i>Biochim Biophys Acta</i> 2007; <b>1775</b> :263-273] |
| Merlin(Phospho-Ser518)          | 1.24                       | [ <i>Med Hypotheses</i> 2006; <b>67</b> :1095-1098]       |
| Pyk2(Phospho-Tyr402)            | 1.20                       | [ <i>J Cell Sci</i> 2001; <b>114</b> :2977-2987]          |
| Stathmin1(Phospho-Ser15)        | 1.19                       | [ <i>Mol Biol Cell</i> 2008; <b>19</b> :2003-2013]        |
| Stathmin1(Phospho-Ser24)        | 1.18                       | [ <i>Mol Biol Cell</i> 2008; <b>19</b> :2003-2013]        |
| Stathmin1(Phospho-Ser37)        | 1.17                       | [ <i>Mol Biol Cell</i> 2008; <b>19</b> :2003-2013]        |
| Ezrin(Phospho-Tyr353)           | 1.19                       | [ <i>Nature</i> 2004; <b>427</b> :541-544]                |
| Src(Phospho-Tyr416)             | 1.16                       | [ <i>J Cell Sci</i> 2007; <b>120</b> :1833-1840]          |
| c-Raf(Phospho-Ser296)           | 1.32                       | [ <i>Am J Pathol</i> 2012; <b>180</b> :862-871]           |
| MEK1(Phospho-Thr286)            | 2.28                       | [ <i>Cancer Res</i> 2002; <b>62</b> :4781-4790]           |
| MEK1(Phospho-Ser221)            | 1.15                       | [ <i>Cancer Res</i> 2002; <b>62</b> :4781-4790]           |
| MKK3/MAP2K3(Phospho-Thr222)     | 1.23                       | [ <i>Matrix Biol</i> 2005; <b>24</b> :478-488]            |
| p44/42MAPKinase(Phospho-Thr202) | 1.46                       | [ <i>Eur J Cancer</i> 2011; <b>47</b> :1115-1124]         |
| p44/42MAPKinase(Phospho-Tyr204) | 1.19                       | [ <i>Eur J Cancer</i> 2011; <b>47</b> :1115-1124]         |
| AKT(Phospho-Ser473)             | 1.42                       | [ <i>Cell Cycle</i> 2008; <b>7</b> :2991-2996]            |
| AKT(Phospho-Thr308)             | 1.20                       | [ <i>Cell Cycle</i> 2008; <b>7</b> :2991-2996]            |

The phospho-antibody microarray identified a list of protein factors whose phosphorylation states increased in HUH-7 cells when MPZL1 was stably overexpressed. The signal intensities of phosphorylated proteins and the total protein levels were determined. The ratio of each protein was determined as the ratio between the percentages of phosphorylated proteins in total proteins in HUH-7 MPZL1 and HUH-7 VECTOR cells.
