# Supplementary material
Source: PubMed Central journal article supplement (PMC3915911)
Supplement: cr2013158x5.pdf [file cr2013158x5.pdf]

**Supplementary information, Table S5** The sequences of siRNAs and shRNA plasmids used

| <b>siRNAs/shRNAs</b>   | <b>Sequence (5' to 3')</b> | <b>Origin</b>           |
|------------------------|----------------------------|-------------------------|
| siRNA-Negative control | TTCTCCGAACGTGTCACGT        | Genepharma              |
| siRNA-CTTN-1           | GCCACGAAUAUCAGUCGAATT      | Genepharma              |
| siRNA-CTTN-2           | CAGAAGGUCACGUGGAAAUTT      | Genepharma              |
| siRNA-CTTN-3           | CACACCUCAUAGGUAUGAUTT      | Genepharma              |
| siRNA-Src-1            | CAGGCUGAGGAGUGGUAUUTT      | Genepharma              |
| siRNA-Src-2            | GCCUCAACGUGAAGCACUATT      | Genepharma              |
| siRNA-Src-3            | CUCGGCUCAUUGAAGACAATT      | Genepharma              |
| siRNA-SHP-2-1          | GGGCACGAAUAUACAAAUATT      | Genepharma              |
| siRNA-SHP-2-2          | GAAGCACAGUACCGAUUUATT      | Genepharma              |
| siRNA-SHP-2-3          | GACCACAGAUAAAGUCAAAATT     | Genepharma              |
| shRNA-Negative control | ACCTCCACCCTCACTCTGCCAT     | Open biosystems, Thermo |
| shRNA-MPZL1-1          | TGACATCACAGATATAGGT        | Open biosystems, Thermo |
| shRNA-MPZL1-2          | TCAAGTGGCATAGCCAATG        | Open biosystems, Thermo |
| shRNA-MPZL1-3          | CCGAAAGAATTAAGAGAAT        | Open biosystems, Thermo |
