# Supplementary material
Source: PubMed Central journal article supplement (PMC3915911)
Supplement: cr2013158x6.pdf [file cr2013158x6.pdf]

**Supplementary information, Table S6 Primers used for q-PCR and subclone**

**Primers used for q-PCR.**

| <b>Gene symbol</b> | <b>Forward (5' to 3')</b> | <b>Reverse (5' to 3')</b> | <b>Accession</b> |
|--------------------|---------------------------|---------------------------|------------------|
| MPZL1-g/c          | CTCCAAGGGCAAGTGTA         | CAACGATGTCAGGAGGGT        | NM_003953.5      |
| MPZL1a             | AAAACCCTCCTGACATCG        | CTAACTGTGCATATATGACTGG    | NM_024569.4      |
| MPZL1b             | TGGAGTATCAGCCTTGGA        | TCCGCATACACCACAGAC        | NM_001146191.1   |
| ATP1B1-c           | CAGTGAACCGAAAGAACG        | ACTGAACGGGAAGGACAT        | NM_001677.3      |
| ATP1B1-g           | TTGTAGGCGAATCTATGAG       | AAGCACTATTTCCCTGACT       | NC_000001.10     |
| NEM7-c             | TCACCAGTCAAGACCCTT        | TCTTATGCCATCTGTTCC        | NM_138638.4      |
| NEM7-g             | TATGAGCAAGGGCAGTTA        | TTGAGTAGGGAAGGAAGG        | NC_000014.8      |
| PIGC-c             | AGCCCTTTCCTGATAACT        | CCAGACCAGTCCCTAAAA        | NM_153747.1      |
| PIGC-g             | TTCTTCACTGATTGGGTAT       | TGACATGGCATAGATGGT        | NC_000001.10     |
| LINE-1             | AAAGCCGCTCAACTACATGG      | TGCTTTGAATGCGTCCCAGAG     | NC_000002.11     |
| $\beta$ -actin     | AGTGTGACGTGGACATCCGCAAG   | ATCCACATCTGCTGGAAGGTGGAC  | NM_001101.3      |

g, genomic DNA; c, cDNA. The human MPZL1 consists of 3 isoforms (MPZL1, MPZL1a and MPZL1b) differing in their cytoplasmic sequences.

**Primers used for subclone.**

| <b>Gene symbol</b> | <b>Forward (5' to 3')</b>  | <b>Reverse (5' to 3')</b>    | <b>Accession</b> |
|--------------------|----------------------------|------------------------------|------------------|
| MPZL1-ORF          | CGGGATCCATGGCAGCGTCCG      | CGGAATTCCTAATTCTTTCGGATATCC  | NM_003953.5      |
| CTTN-ORF           | CGGGATCCATGTGAAAGCTTCAGCA  | CGGAATTCCTACTGCCGAGCTCC      | NM_005231.3      |
| CTTN-Y421D         | CCCCGTCGATGAGGATG          | CATCCTCATCGACGGGG            | NM_005231.3      |
| CTTN-Y421A         | CCCCGTCGCTGAGGATG          | CATCCTCAGCGACGGGG            | NM_005231.3      |
| CTTN-Y470D         | GAGGCTGTCGATGAAAGCG        | CGCTTTCATCGACAGCCTC          | NM_005231.3      |
| CTTN-Y470A         | GAGGCTGTCGCTGAAAGCG        | CGCTTTCAGCGACAGCCTC          | NM_005231.3      |
| CTTN-Y486D         | GACAGCACCGATGATGAGTAC      | GTACTCATCATCGGTGCTGTC        | NM_005231.3      |
| CTTN-Y486A         | GACAGCACCGCTGATGAGTAC      | GTACTCATCAGCGGTGCTGTC        | NM_005231.3      |
| SRC-ORF            | CGACGCGTATGGGTAGCAACAAGAGC | CGGAATTCCTAGAGTTCTCCCCGG     | NM_005417.3      |
| SRC-K298M          | TGGCCATCATGACCCTGA         | TCAGGGTCATGATGGCCA           | NM_005417.3      |
|                    | ACCTGCAGGCCTTCTGGAGGACTAC  | CGGAATTCCTAGAGTTCTCCCCGGGCTG |                  |
| SRC-Y530F          | TTCACGTCCACCGAGCCCCAGTTCCA | GAAGTGGGGCTCGGTGGACGTGAAGTAG | NM_005417.3      |
|                    | GCCCGGGGAGAACCTCTAG        | TCCTCCAGGAAGGCCTGCAGGT       |                  |

\*, the isoform a (full length MPZL1) of MPZL1 was used in this study (Accession number: NM\_003953.5).
