# Supplementary material
Source: PubMed Central journal article supplement (PMC3915911)
Supplement: cr2013158x7.pdf [file cr2013158x7.pdf]

**Supplementary information, Table S7** Clinical and pathological features of 58 HCC specimens

| ID    | Gender | Age (y) | HBsAg | anti-HCV | Cirrhosis | Edmondson grade | Intrahepatic metastasis | Serum AFP level (ng/mL) |
|-------|--------|---------|-------|----------|-----------|-----------------|-------------------------|-------------------------|
| HK08  | M      | 52      | +     | -        | Y         | III             | -                       | 2347.5                  |
| HK14  | M      | 55      | +     | +        | N         | IV              | -                       | 11224.3                 |
| HK17  | M      | 47      | +     | -        | Y         | III             | -                       | 495.4                   |
| HK26  | M      | 42      | +     | -        | Y         | III             | +                       | 632.8                   |
| HK31  | M      | 66      | +     | -        | Y         | I               | +                       | 11.4                    |
| HK32  | F      | 60      | +     | -        | Y         | I               | -                       | 6.2                     |
| HK35  | M      | 55      | +     | -        | Y         | I               | -                       | 2769.7                  |
| HK38  | M      | 58      | +     | -        | Y         | II              | -                       | 104.9                   |
| HK39  | M      | 57      | -     | -        | N         | II              | +                       | 84.7                    |
| HK41  | M      | 46      | -     | -        | N         | III             | +                       | 2.8                     |
| HK42  | M      | 58      | +     | -        | Y         | I               | -                       | 871.3                   |
| HK43  | M      | 62      | +     | -        | Y         | I               | -                       | 12.9                    |
| HK51  | M      | 42      | +     | -        | Y         | III             | +                       | Null                    |
| HK54  | M      | 31      | +     | -        | N         | II              | +                       | 576.6                   |
| HK56  | M      | 50      | +     | -        | N         | III             | +                       | 110.6                   |
| HK60  | M      | 52      | -     | -        | N         | II              | -                       | 158526                  |
| HK70  | M      | 43      | +     | -        | N         | IV              | +                       | 7572.4                  |
| HK71  | M      | 59      | +     | -        | Y         | II              | -                       | 621                     |
| HK80  | M      | 75      | +     | -        | Y         | Null            | Null                    | 10.7                    |
| QD127 | M      | 43      | +     | -        | N         | IV              | +                       | Null                    |
| QD128 | M      | 42      | +     | -        | Y         | III             | +                       | <20                     |
| QD130 | F      | 45      | +     | Null     | Y         | Null            | Null                    | >400                    |
| QD131 | M      | 41      | +     | Null     | N         | Null            | Null                    | <20                     |
| QD132 | M      | 56      | -     | Null     | N         | II              | -                       | 380                     |
| QD133 | M      | 66      | +     | -        | Y         | III             | +                       | 328                     |
| QD134 | M      | 45      | +     | -        | N         | III             | -                       | >400                    |
| QD135 | F      | 44      | -     | -        | N         | IV              | +                       | <20                     |
| QD136 | M      | 34      | -     | +        | N         | IV              | +                       | <20                     |
| QD137 | M      | 52      | -     | +        | N         | II              | -                       | <20                     |
| QD138 | M      | 60      | +     | -        | N         | IV              | +                       | 200                     |
| QD152 | M      | 45      | +     | -        | Y         | III             | +                       | 320                     |
| QD153 | M      | 47      | +     | -        | N         | IV              | -                       | >400                    |
| QD154 | M      | 48      | +     | -        | N         | II              | -                       | >400                    |
| QD155 | F      | 66      | +     | -        | N         | III             | +                       | >400                    |
| QD156 | M      | 42      | +     | -        | N         | III             | -                       | 40                      |
| QD157 | F      | 51      | +     | -        | N         | II              | -                       | 300                     |
| QD161 | M      | 48      | +     | -        | N         | II              | Null                    | >400                    |
| QD162 | F      | 67      | +     | +        | N         | III             | -                       | 250                     |
| QD166 | F      | 54      | -     | -        | N         | III             | +                       | >400                    |

|       |   |    |   |      |   |     |   |       |
|-------|---|----|---|------|---|-----|---|-------|
| QD313 | F | 46 | + | Null | Y | II  | + | 859   |
| QD314 | M | 63 | + | -    | N | II  | - | 10    |
| QD315 | M | 44 | + | -    | Y | III | + | 362   |
| QD316 | M | 50 | + | -    | N | III | + | 6     |
| QD317 | M | 47 | + | Null | N | IV  | + | 8     |
| QD318 | F | 49 | + | Null | Y | III | + | 766   |
| QD321 | M | 66 | + | -    | Y | III | - | >1000 |
| QD323 | M | 46 | + | Null | Y | II  | - | 517   |
| QD336 | M | 32 | + | Null | N | III | + | 735   |
| QD337 | M | 36 | + | Null | Y | III | + | 701   |
| QD338 | M | 49 | - | Null | N | IV  | + | 11.7  |
| QD339 | F | 54 | + | -    | N | III | - | 624   |
| QD340 | M | 74 | - | Null | N | III | - | Null  |
| QD341 | F | 43 | - | Null | N | IV  | + | 464   |
| QD343 | M | 69 | + | Null | N | IV  | - | 303   |
| QD344 | M | 72 | + | Null | Y | II  | - | 415   |
| QD345 | M | 50 | + | Null | Y | III | + | 9     |
| QD346 | M | 61 | - | Null | N | IV  | - | 261.6 |
| QD347 | M | 52 | + | Null | N | II  | + | 728   |

Notes: HBsAg, hepatitis B surface antigen; anti-HCV, antibody against HCV, Null, not available. Gender ratio M/F is 47/11, the age ranges from 31-75, with HBV infection positive/negative 46/12 and HCV infection positive/negative 4/37 as well as 17 Null. Hepatocirrhosis positive/negative is 24/34, and intrahepatic metastasis positive/negative is 28/26 as well as 4 Null. Serum AFP level over 400 ng/mL is 27 cases (46.6%).
