# Supplementary material
Source: PubMed Central journal article supplement (PMC3915911)
Supplement: cr2013158x8.pdf [file cr2013158x8.pdf]

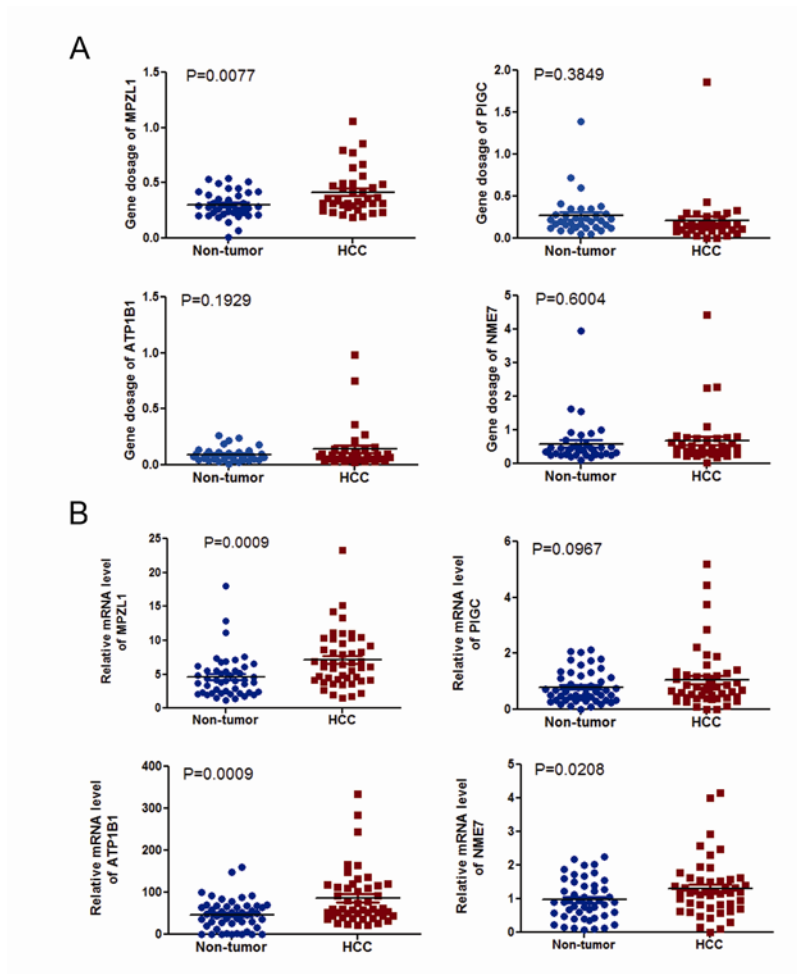

**Supplementary information, Figure S1** Examination of the DNA dosages and expression levels of four candidate genes in HCCs. **(A)** Validation of DNA dosages of four candidate genes (*MPZL1*, *ATP1B1*, *NME7* and *PIGC*) by q-PCR in 37 paired HCCs. **(B)** Validation of gene expression of four candidate genes by q-PCR in 49 paired HCCs. Statistical analysis of differences between groups was performed by paired Student's *t* test. Results are shown as the mean  $\pm$  s.e.m and  $P < 0.05$  was considered statistically significant.
