# Supplementary material
Source: PubMed Central journal article supplement (PMC3915911)
Supplement: cr2013158x10.pdf [file cr2013158x10.pdf]

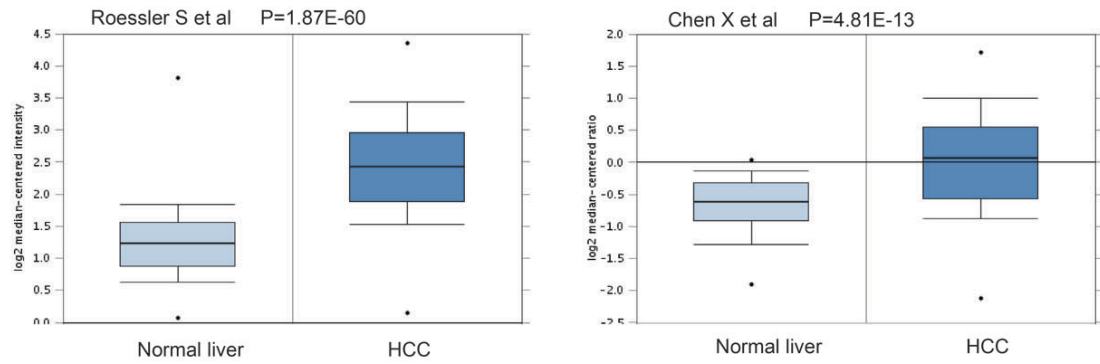

**Supplementary information, Figure S3** The expression levels of MPZL1 in HCC derived from gene expression arrays. Boxed plot of MPZL1 expression levels in HCC cancer patients using Oncomine expression analysis [1].

Reference:

1. *Neoplasia* 2004; 6:1-6
