# Supplementary material
Source: PubMed Central journal article supplement (PMC3915911)
Supplement: cr2013158x12.pdf [file cr2013158x12.pdf]

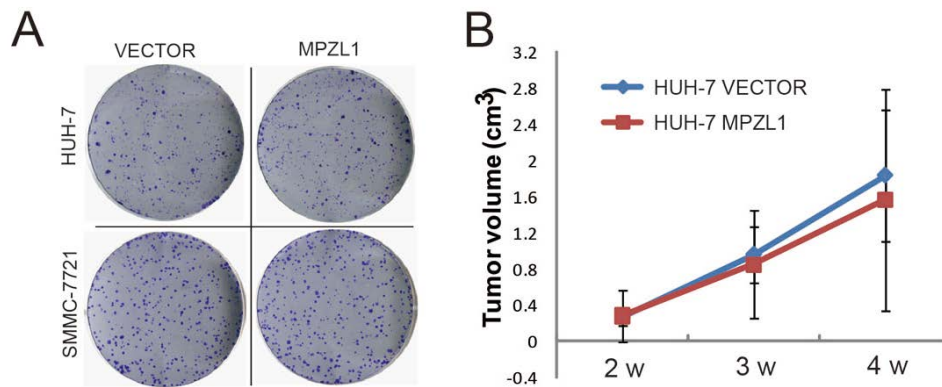

**Supplementary information, Figure S5** Enforced expression of *MPZL1* has no significant effect on HCC cell proliferation. **(A)** Representative result of colony formation assays for the effects of *MPZL1* overexpression on the *in vitro* proliferation of Huh-7 and SMMC-7721 cells. **(B)** The effects of *MPZL1* on the *in vivo* growth abilities of HUH-7 cells in xenograft mouse models by subcutaneously (s.c.) inject tumor cells into the right upper flank region of the nude mice (n=7). Statistical analysis of differences between groups was performed by unpaired Student's *t* test. Results are shown as the mean  $\pm$  s.e.m and  $P < 0.05$  was considered statistically significant.
