# Supplementary material
Source: PubMed Central journal article supplement (PMC3915911)
Supplement: cr2013158x13.pdf [file cr2013158x13.pdf]

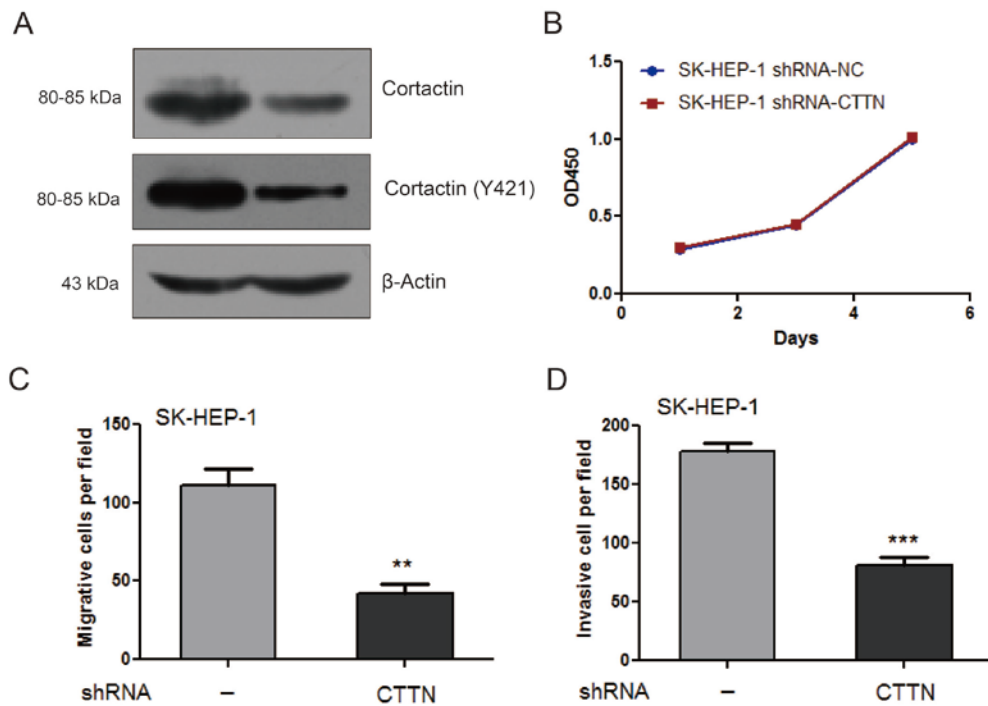

**Supplementary information, Figure S6** Knockdown of the *CTTN* gene inhibits the migratory and invasive abilities of HCC cells. **(A)** The detection of the shRNA-mediated knockdown of the *CTTN* gene in SK-HEP-1 cells by immunoblotting. **(B)** A representative result of the CCK-8 assays for the effects of *CTTN* knockdown on the *in vitro* proliferation of SK-HEP-1 cells. **(C, D)** Representative results of the trans-well assays for the effects of *CTTN* knockdown on the *in vitro* migratory and invasive abilities of SK-HEP-1 cells (unpaired Student's t test, the mean  $\pm$  s.e.m, \*\* $P < 0.01$ ; \*\*\* $P < 0.001$ ).
