# Supplementary material
Source: PubMed Central journal article supplement (PMC3915911)
Supplement: cr2013158x14.pdf [file cr2013158x14.pdf]

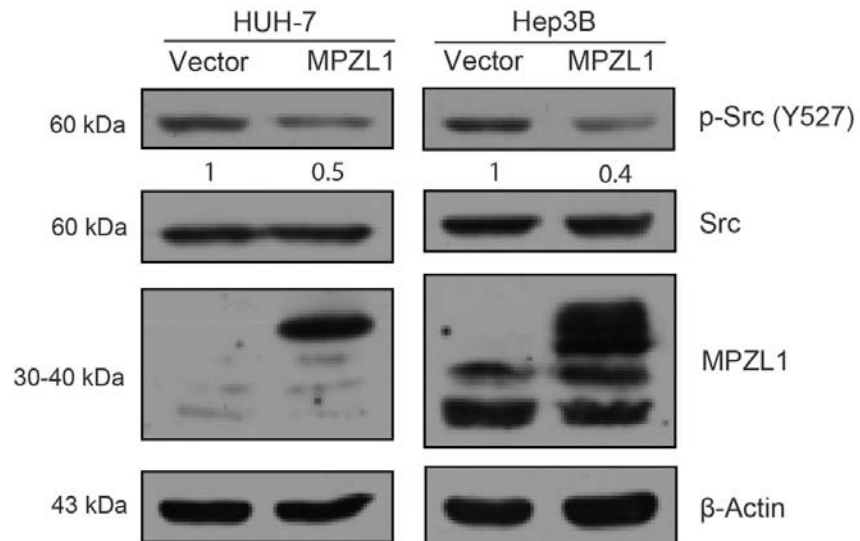

**Supplementary information, Figure S7** Ectopic expression of *MPZL1* leads to decreased phosphorylation levels of negative regulatory site of Src (Y527). The overexpression of *MPZL1* in HUH-7 and Hep3B cells decreases the phosphorylation of Src (Y527) protein.
