# Supplementary material
Source: PubMed Central journal article supplement (PMC3915911)
Supplement: cr2013158x16.pdf [file cr2013158x16.pdf]

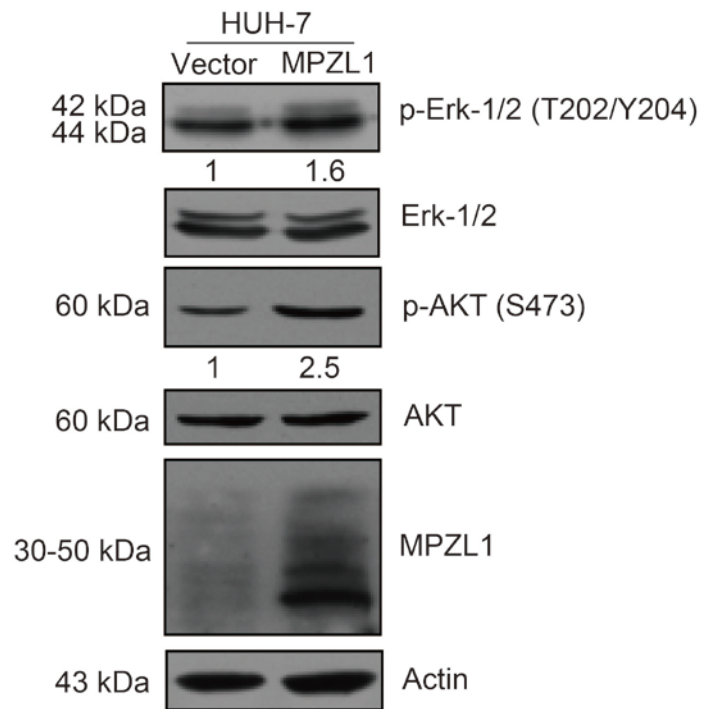

**Supplementary information, Figure S9** The overexpression of *MPZL1* in HUH-7 cells induces the phosphorylation of the Erk-1/2 (T202/Y204) and AKT (S473) proteins.
