# Supplementary material
Source: PubMed Central journal article supplement (PMC3915911)
Supplement: cr2013158x17.pdf [file cr2013158x17.pdf]

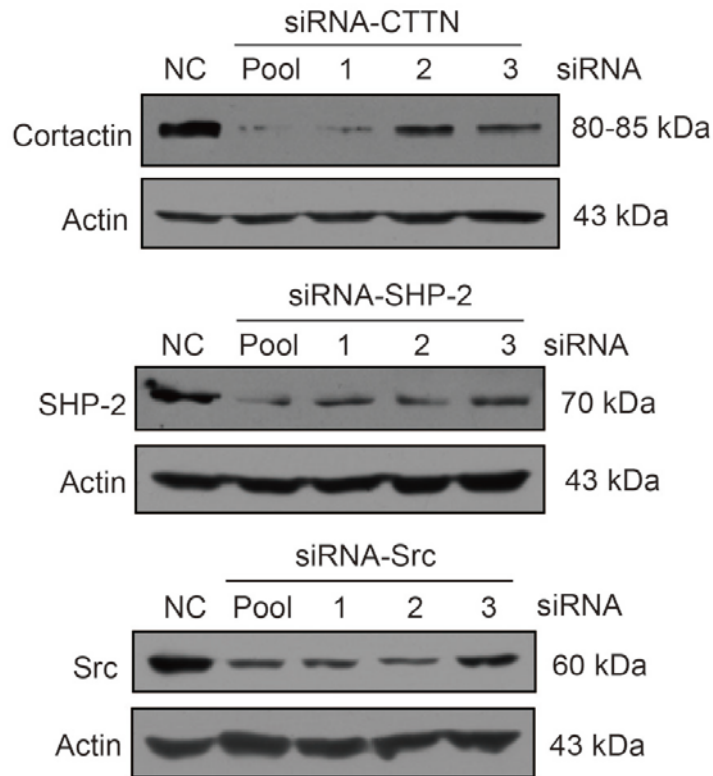

**Supplementary information, Figure S10** The detection of siRNA mediated knockdown of targeted genes (*CTTN*, *SHP-2* and *Src*) in HCC cells by immunoblotting. In the current study, three different siRNAs were used to target the *CTTN*, *Src* and *SHP2* gene, respectively. The knockdown efficiency of each siRNA was examined by immunoblotting. Recently, siRNA pool has been widely used in RNA interference assays [1, 2]. For the *Src* and *SHP-2* genes, we employed siRNA pools (mixture of three different siRNAs) against individual genes, and the results showed that the siRNA pool and each siRNA can significantly knockdown the target genes. For the *CTTN* gene, all the three siRNAs can significantly knockdown this

gene. Subsequently, the siRNA sequence that was most effective in targeting *CTTN* (siRNA-CTTN-1) was used further to construct shRNA vectors.

References:

1. *Nature* 2004; 427:541-544.
2. *Nat Rev Genet* 2006; 7:373-384
